# Supplementary material for: An in vitro network of intermolecular interactions between viral RNA segments of an avian H5N2 influenza A virus: comparison with a human H3N2 virus
Source: PubMed Central journal article supplement — Nucleic Acids Res. 2012 Dec 5;41(2):1241–54. doi: 10.1093/nar/gks1181 (PMC3553942; doi:10.1093/nar/gks1181), 2012-12-05
Supplement: supp_gks1181_nar-02217-v-2012-File013.pdf [file supp_gks1181_nar-02217-v-2012-File013.pdf]

## Supplementary Material to:

# An *in vitro* network of intermolecular interactions between viral RNA segments of an avian H5N2 influenza A virus: comparison with a human H3N2 virus

Cyrille Gavazzi<sup>1</sup>, Catherine Isel<sup>1</sup>, Emilie Fournier<sup>1</sup>, Vincent Moules<sup>2</sup>, Annie Cavalier<sup>3</sup>, Daniel Thomas<sup>3</sup>, Bruno Lina<sup>2</sup> and Roland Marquet<sup>1,\*</sup>

<sup>1</sup> Architecture et Réactivité de l'ARN, Université de Strasbourg, CNRS, IBMC, 15 rue René Descartes, 67084 Strasbourg, France

<sup>2</sup> Virologie et Pathologie Humaine, Université Lyon 1, EA4610, Faculté de Médecine RTH Laennec, 69008 Lyon, France

<sup>3</sup> Team "Translation and Folding", Université Rennes 1, UMR CNRS 6290 IGDR, Campus de Beaulieu, bâtiment 13, 35042 Rennes, France

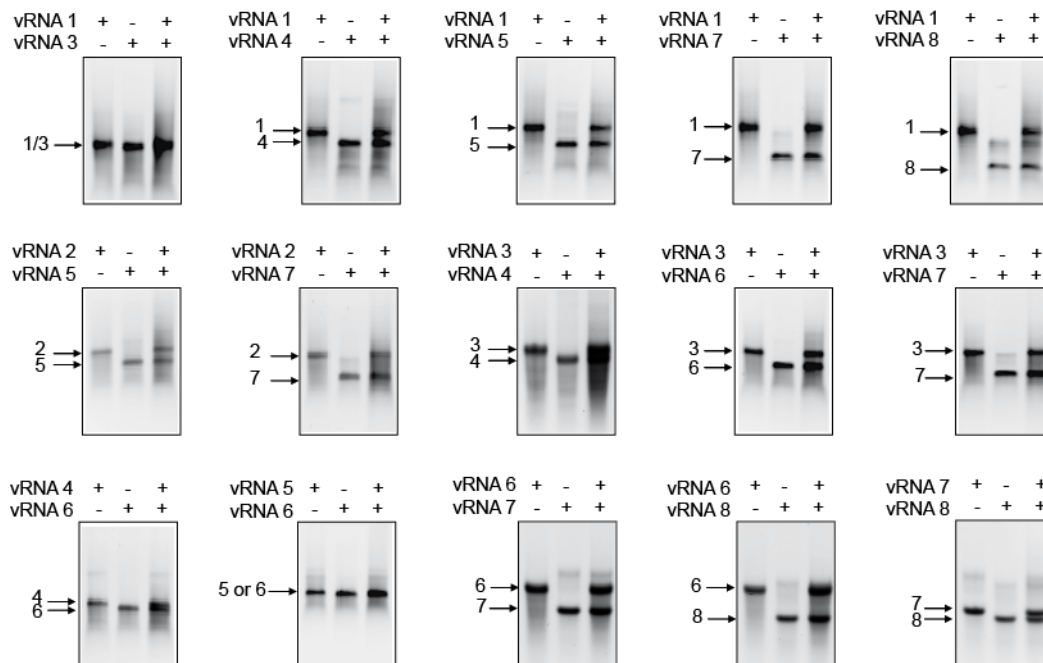

**Supplementary Figure 1: Agarose gel electrophoresis of pairs of vRNAs that don't significantly interact *in vitro*.**

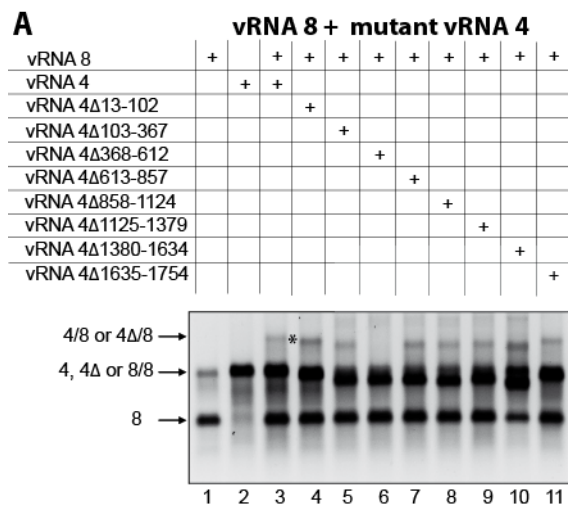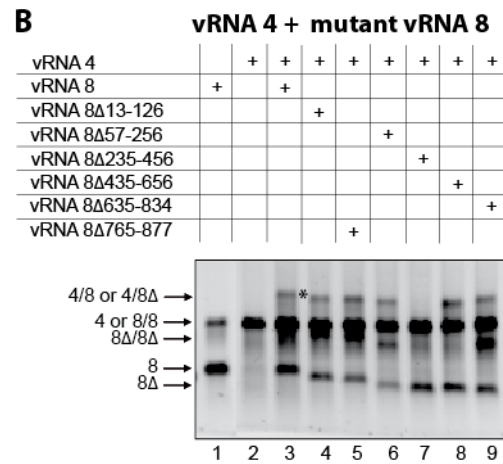

**Supplementary Figure 2: Regions 368-612 of vRNA 4 and 256-435 of vRNA 8 are required for optimal interaction between these vRNAs.** Deletions were introduced in vRNA 4 (A) or vRNA 8 (B) and formation of the intermolecular complex (marked by a black asterisk) was monitored by agarose gel electrophoresis.

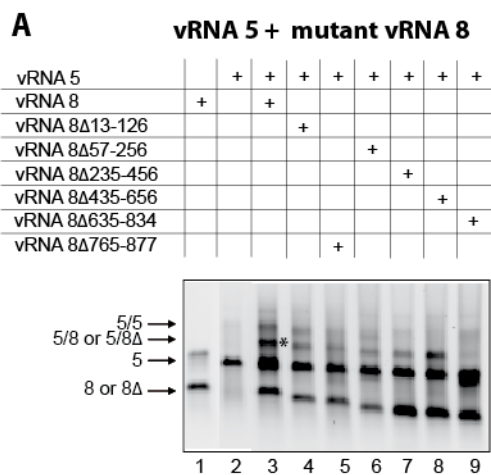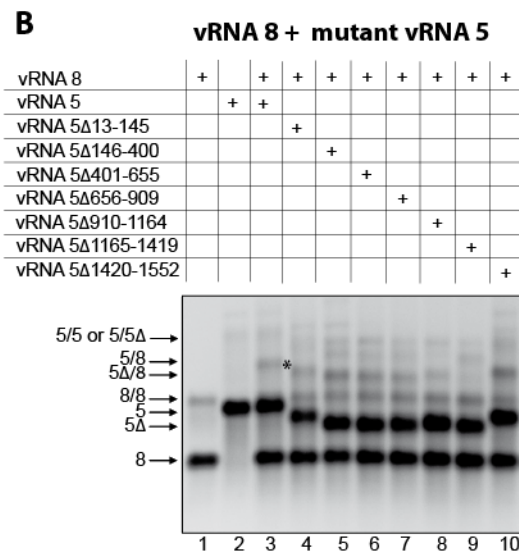

**Supplementary Figure 3: Regions 656-765 of vRNA 8 and 1165-1419 of vRNA 5 are required for optimal interaction between these vRNAs.** Deletions were introduced in vRNA 8 (A) or vRNA 5 (B) and formation of the intermolecular complex was monitored by agarose gel electrophoresis.

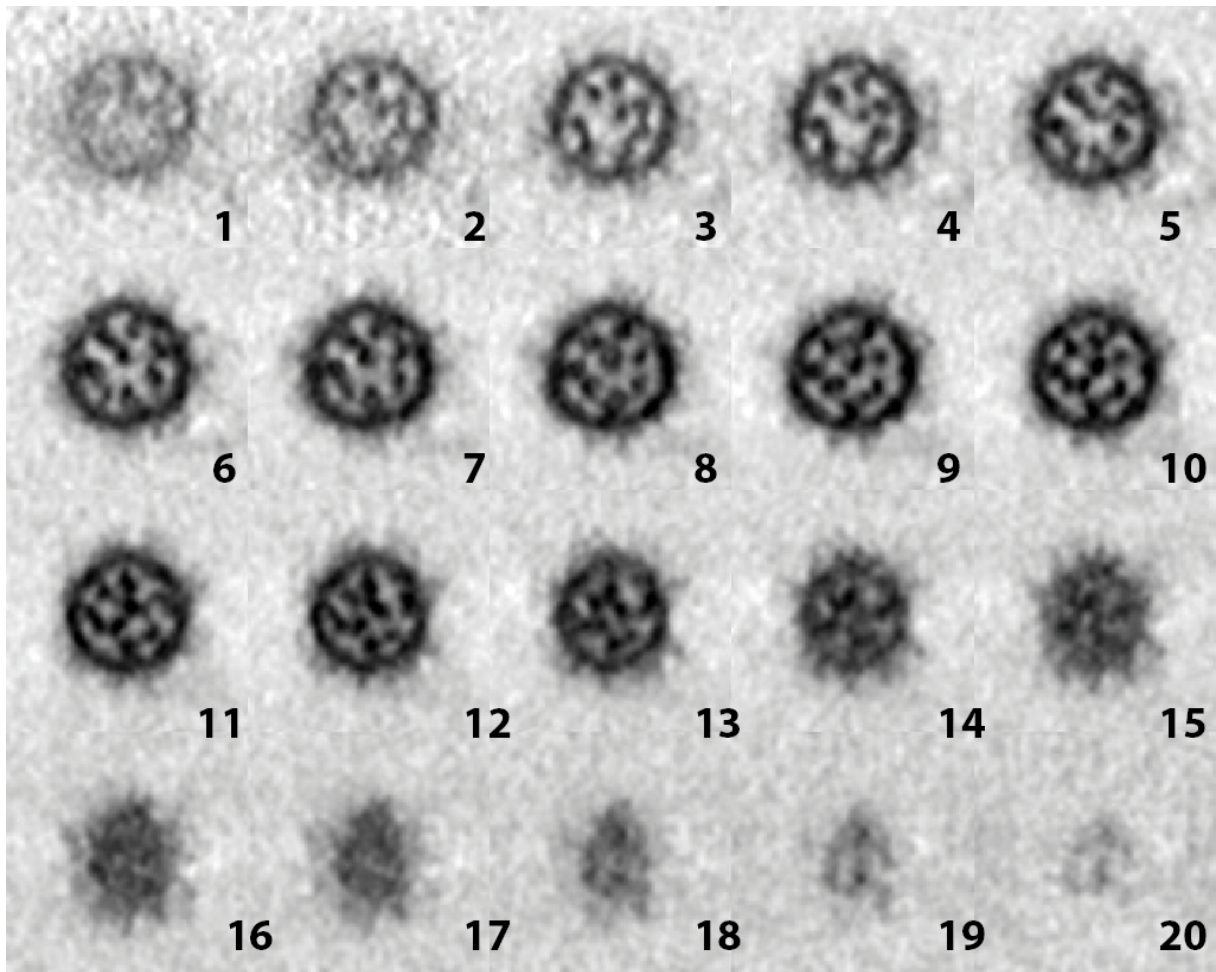

**Supplementary Figure 4: Successive virtual cross-sections obtained by electron tomography of an EN virion budding from MDCK cells, from the bottom to the budding tip of the viral particle.**

**A vRNA 4/vRNA 8**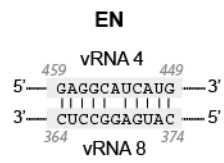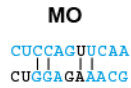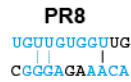**B vRNA 5/vRNA 8**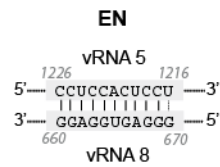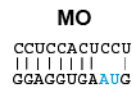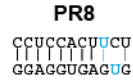**C vRNA 4/vRNA 7**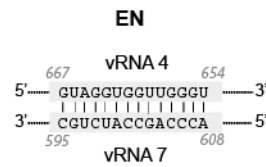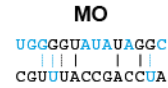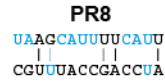**D vRNA 3/vRNA 8**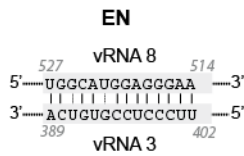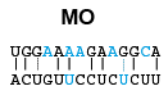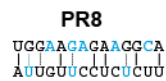**E vRNA 1/vRNA 2**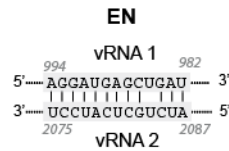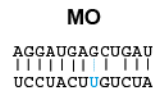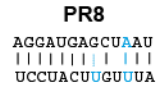

**Supplementary Figure 5: Interacting sequences are not conserved.** Comparison of the sequences involved in the interactions between vRNAs 4 and 8 (A), 5 and 8 (B), 4 and 7 (C), 3 and 8 (D) and 1 and 2 (E) amongst the EN, MO and PR8 AIV strains.
